# Supplementary material
Source: PubMed Central journal article supplement (PMC2828774)

# Supplemental figure 1

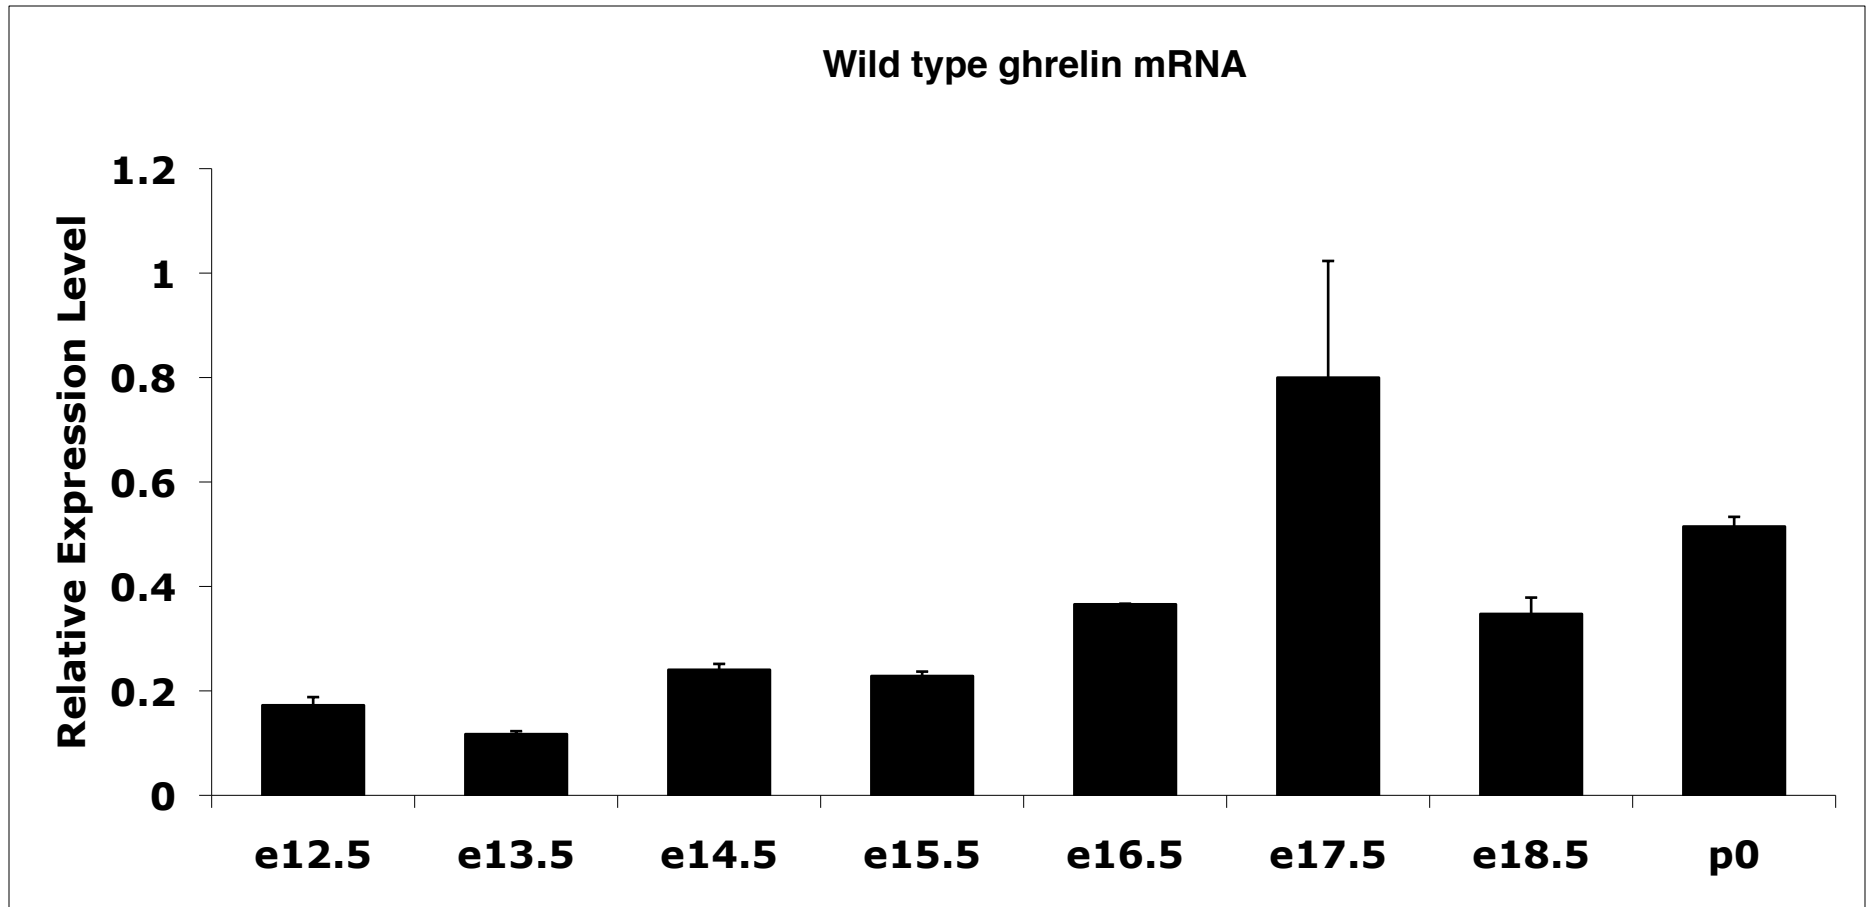

Supplement: NIHMS99959-supplement-ghrelin_supplementary_data.pdf [file NIHMS99959-supplement-ghrelin_supplementary_data.pdf]
